# Supplementary material
Source: PubMed Central journal article supplement (PMC3523653)

## SUPPLEMENTARY DATA

TABLE S1. Gene-specific oligo-DNA primers used in the RT-PCR analysis. Accession numbers are for Phytozome v. 10, *Glycine max* (<http://www.phytozome.net/soybean>)

| Gene name                         | Nucleotide sequences                                                             |
|-----------------------------------|----------------------------------------------------------------------------------|
| <i>GmACS2e</i><br>(Glyma18g47280) | F: CAAGGCATAGCCACTTCACAAAAGG<br>R: TCCACATATACAGGACAACAGTTCAA                    |
| <i>GmACS6a</i><br>(Glyma05g37410) | F: GTCATTGTGCACGCAAAATGTCAAGC<br>R: GCGAGCTCAATTGTGGCTTTAACCAGAGGTGACTG          |
| <i>GmACS9b</i><br>(Glyma01g40400) | F: CGACGTCAGAGAAACCTCGTTTCAG<br>R: TAACTTGTAACCTCCACCAAAAATATTCGG                |
| <i>GmERF</i><br>(Glyma08g15480)   | F: CTCGGATCCATGGATTCACCTTCCTCCTTCTTCAAC<br>R: TTCCCCGGGCTAATTCCTTCTCAAGGAGTGTTTC |
| <i>Actin</i><br>(Glyma19g32990)   | F: GCGTGATCTCACTGATGCCCTCAT<br>R: AGCCTTCGCAATCCACATCTGTTG                       |

Accession numbers are for Phytozome v. 10, *Glycine max*  
(<http://www.phytozome.net/soybean>).

FIG. S1. Morphology of the embryonic axis (root tip + elongation zone) of seeds treated with (A) distilled water (control); (B) 25 mM *N*-acetylcysteine (NAC); (C) 25 mM NAC + 300 ppm ethephon; or (D) 25 mM NAC + 100 mM H<sub>2</sub>O<sub>2</sub> for 24 h. Sections of the embryonic axis were stained with 0.1% toluidine blue. Scale bars = 100 μm.

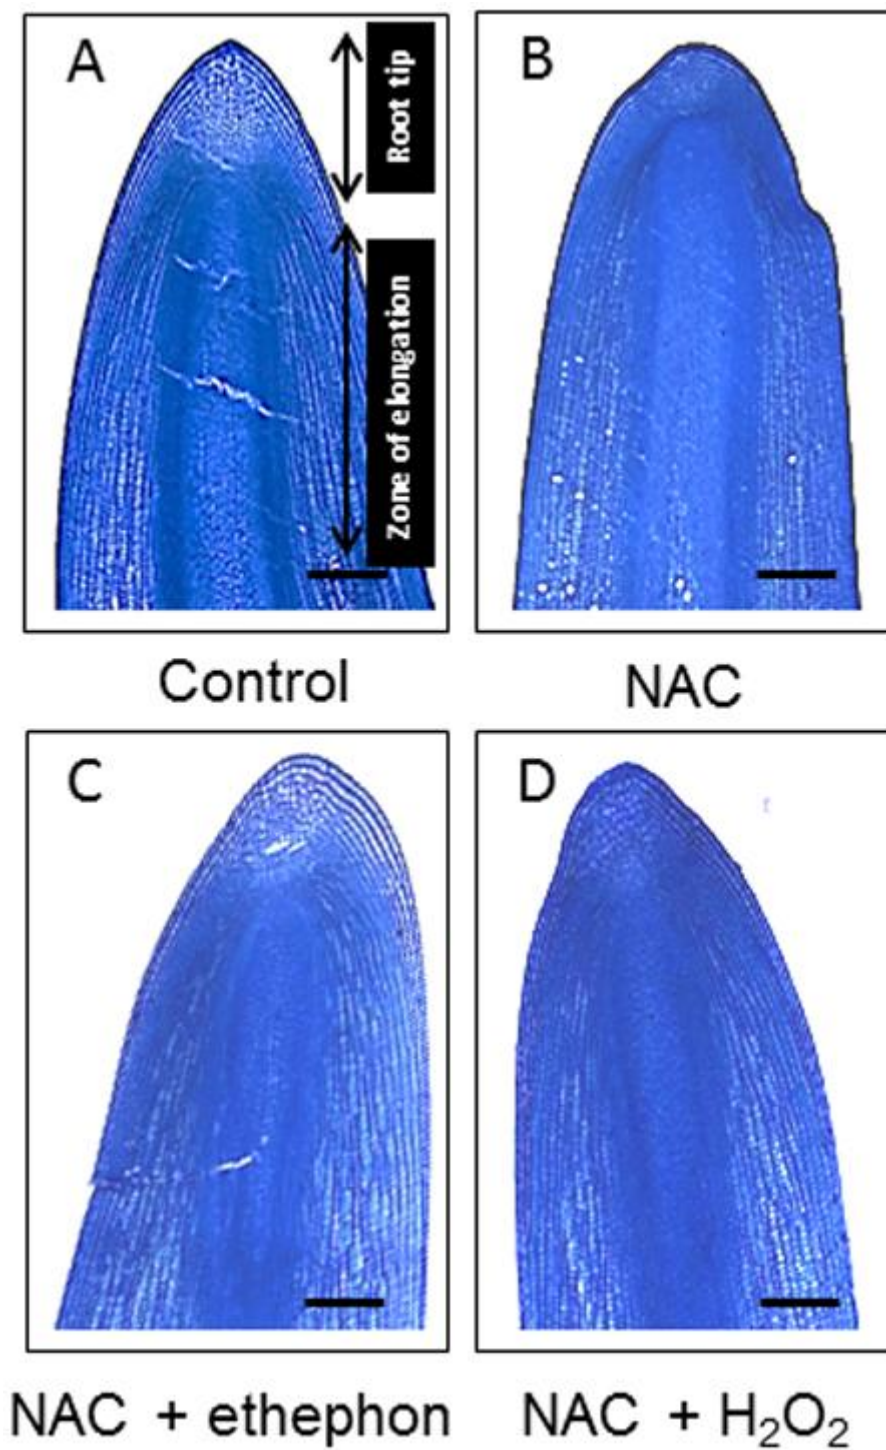

FIG. S2. Hydrogen peroxide (H<sub>2</sub>O<sub>2</sub>) promotes expression of genes for ethylene biosynthesis in embryonic axis during soybean seed germination. Soybean seeds were treated with distilled water (control), H<sub>2</sub>O<sub>2</sub> (100 mM), *N*-acetylcysteine (NAC; 25 mM) and 25 mM NAC + 100 mM H<sub>2</sub>O<sub>2</sub> for 24 h.

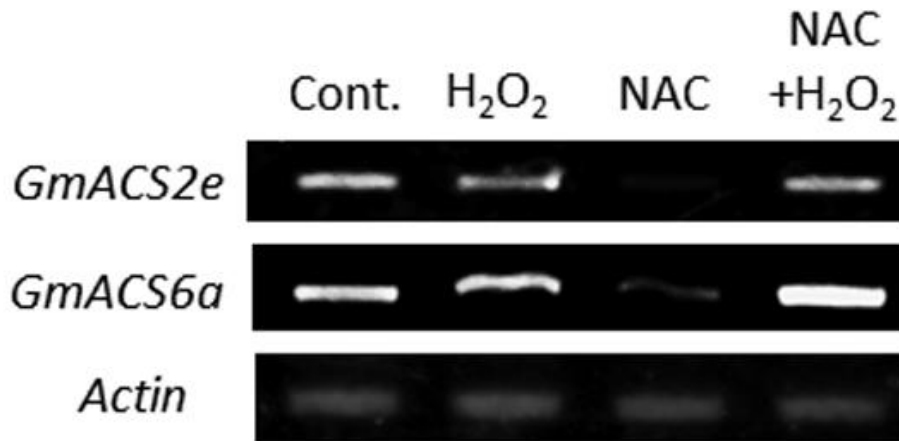

FIG. S3. Number and area of cells in the zone of elongation in the root of seeds treated with distilled water (control) or *N*-acetylcysteine (NAC). (A) The number of cells and (B) the cell area in the elongation zone were traced and then measured using ImageJ software. Values are means  $\pm$  s.d. ( $n = 5$ ).

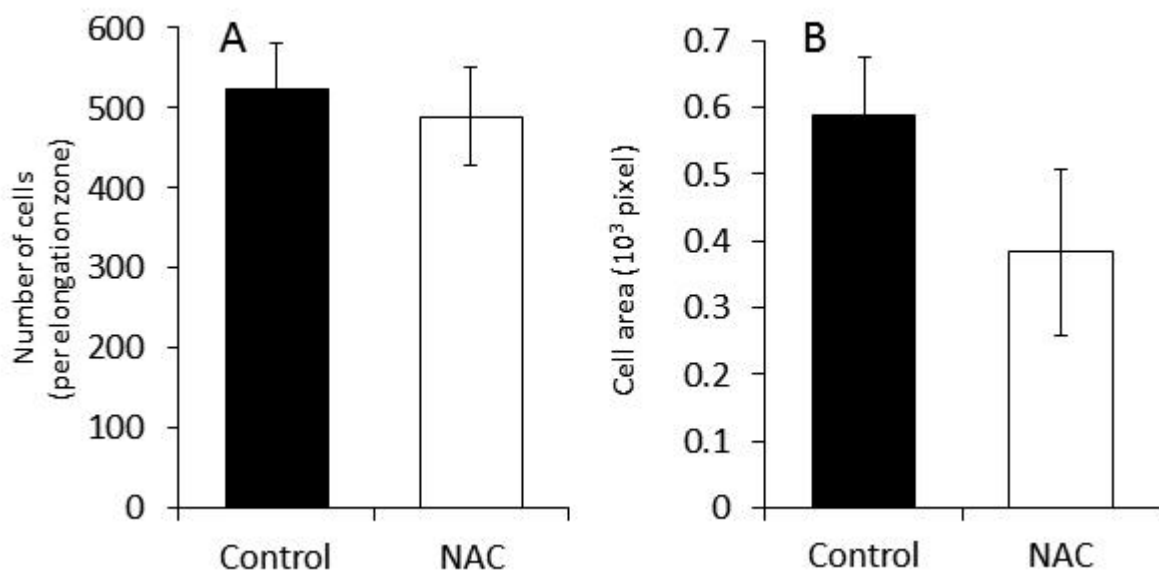

Supplement: supp_mcs240_mcs240supp.pdf [file supp_mcs240_mcs240supp.pdf]
